# Supplementary material
Source: PubMed Central journal article supplement (PMC196878)

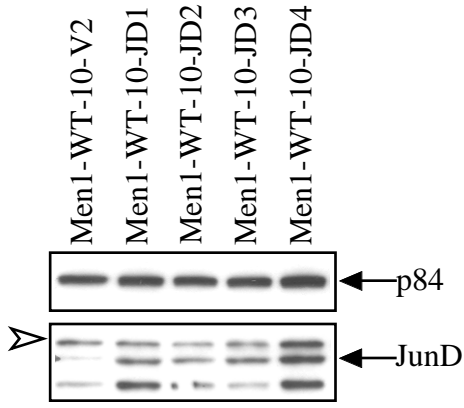

(A)

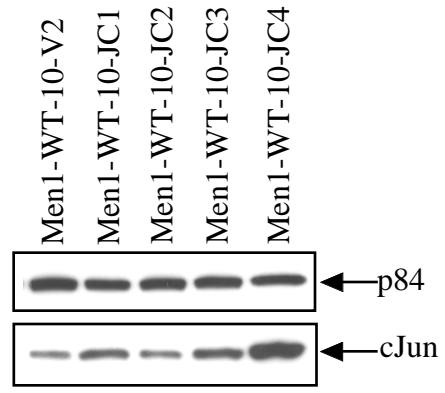

(B)

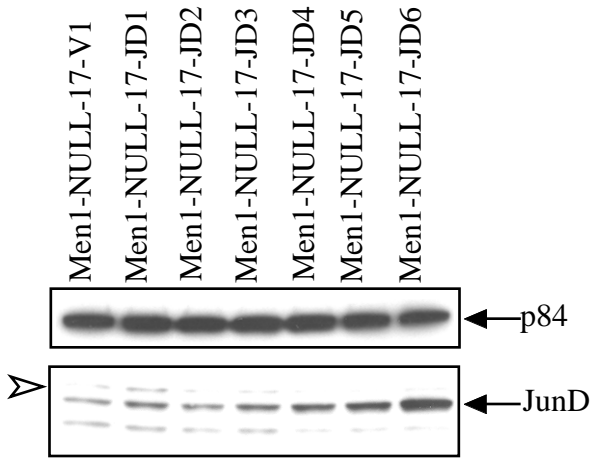

(C)

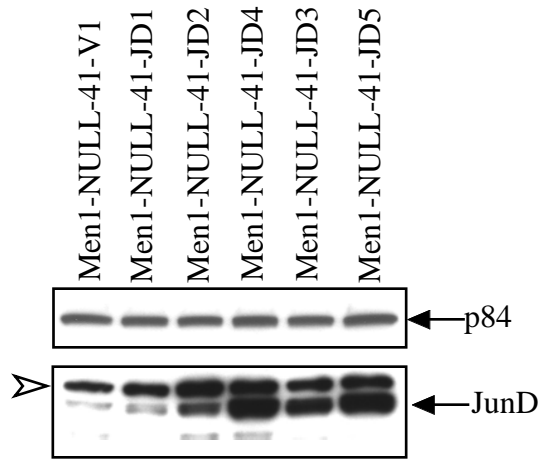

(D)

Supplement: pnas_100_19_10770__2.pdf [file pnas_100_19_10770__2.pdf]

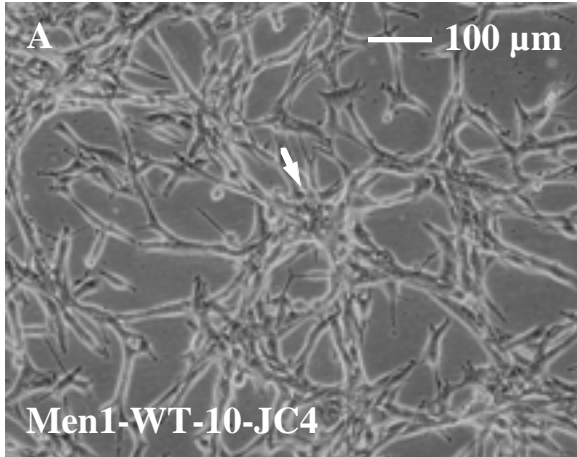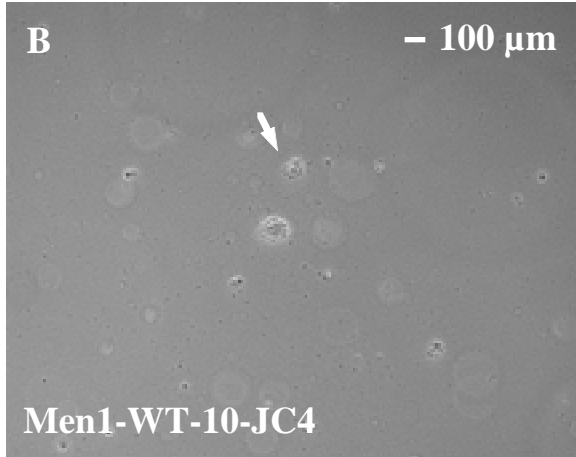

Supplement: pnas_100_19_10770__4.pdf [file pnas_100_19_10770__4.pdf]

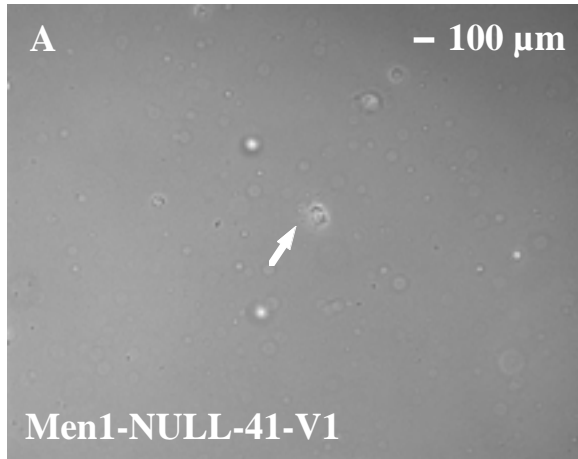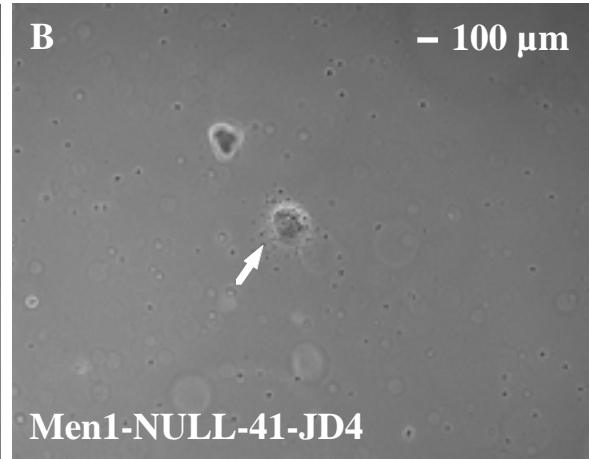

Supplement: pnas_100_19_10770__6.pdf [file pnas_100_19_10770__6.pdf]

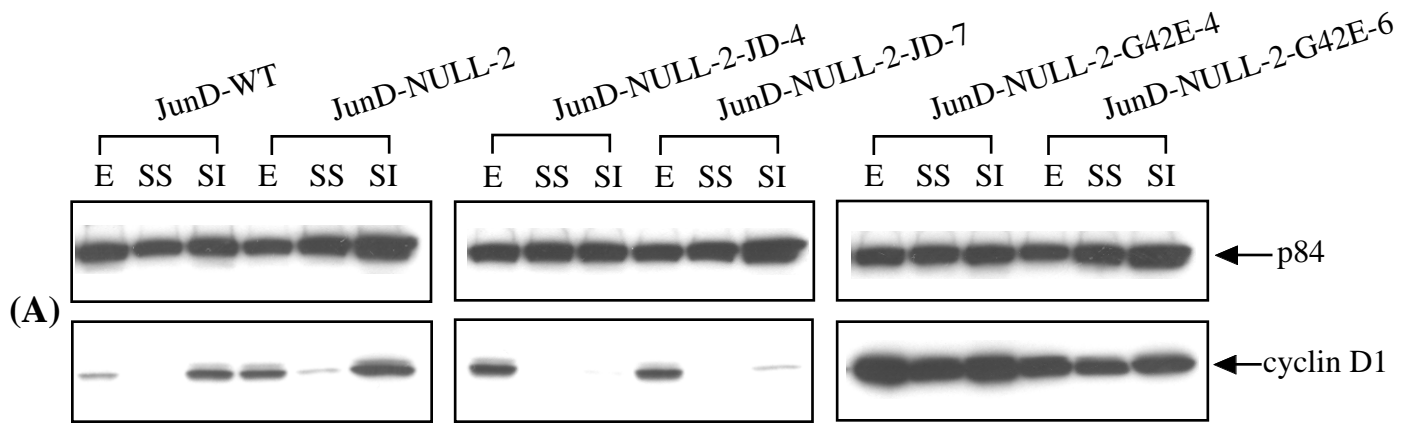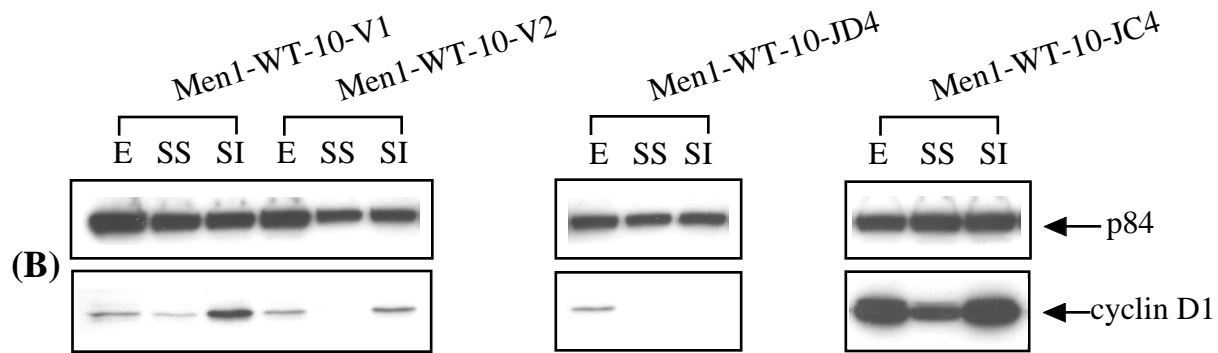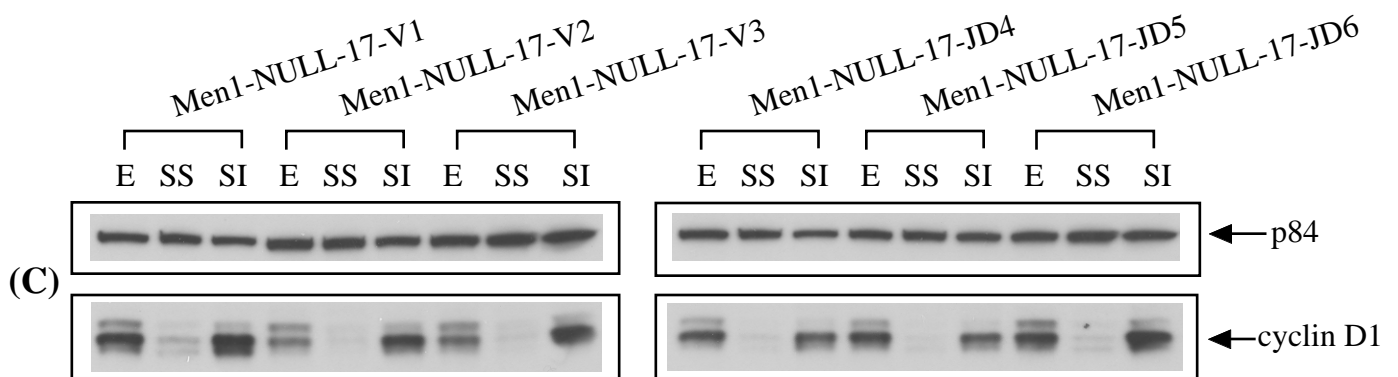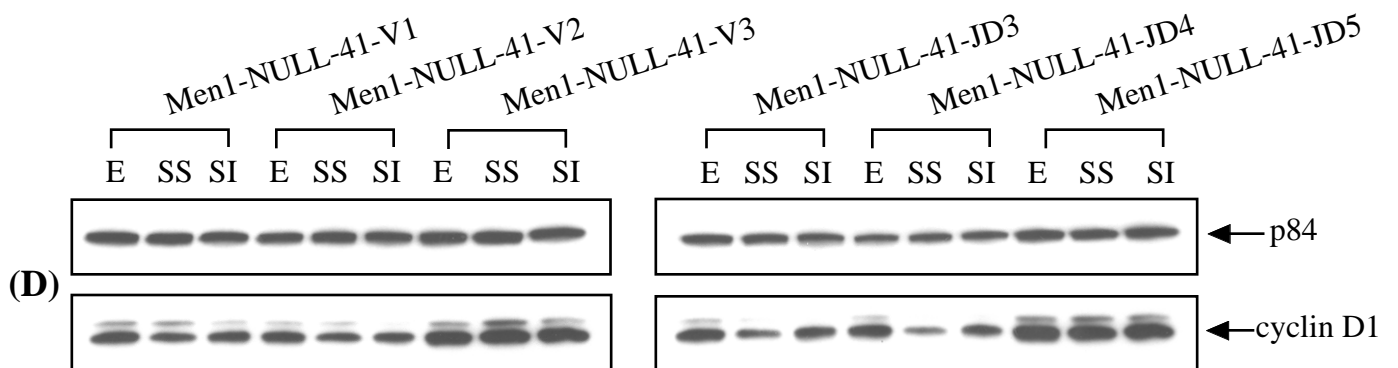

Supplement: pnas_100_19_10770__8.pdf [file pnas_100_19_10770__8.pdf]
